# Supplementary material for: Aggregation-fragmentation and individual dynamics of active clusters
Source: PubMed Central journal article supplement (PMC5814572; doi:10.1038/s41467-017-02625-7), 2018-02-15
Supplement: 41467_2017_2625_MOESM2_ESM.pdf [file 41467_2017_2625_MOESM2_ESM.pdf]

## **Description of Additional Supplementary Files**

File Name: Supplementary Movie 1

Description: A real time movie of the active clusters.
